# Supplementary material for: Single-step solvothermal synthesis of highly uniform CdxZn1−xS nanospheres for improved visible light photocatalytic hydrogen generation
Source: Royal Society of Chemistry journal article supplement (doi:10.1039/d0qi00531b), 2021-01-01
Supplement: d0qi00531b1.pdf [file d0qi00531b1.pdf]

## Electronic Supplementary Information

### Single-Step Solvothermal Synthesis of Highly Uniform $\text{Cd}_x\text{Zn}_{1-x}\text{S}$ Nanospheres for Improved Visible Light Photocatalytic Hydrogen Generation

Joyjit Kundu, Diptangshu Datta Mal, and Debabrata Pradhan\*

Materials Science Centre, Indian Institute of Technology, Kharagpur, W. B. 721 302, India

\*E-mail: [deb@matsc.iitkgp.ac.in](mailto:deb@matsc.iitkgp.ac.in)

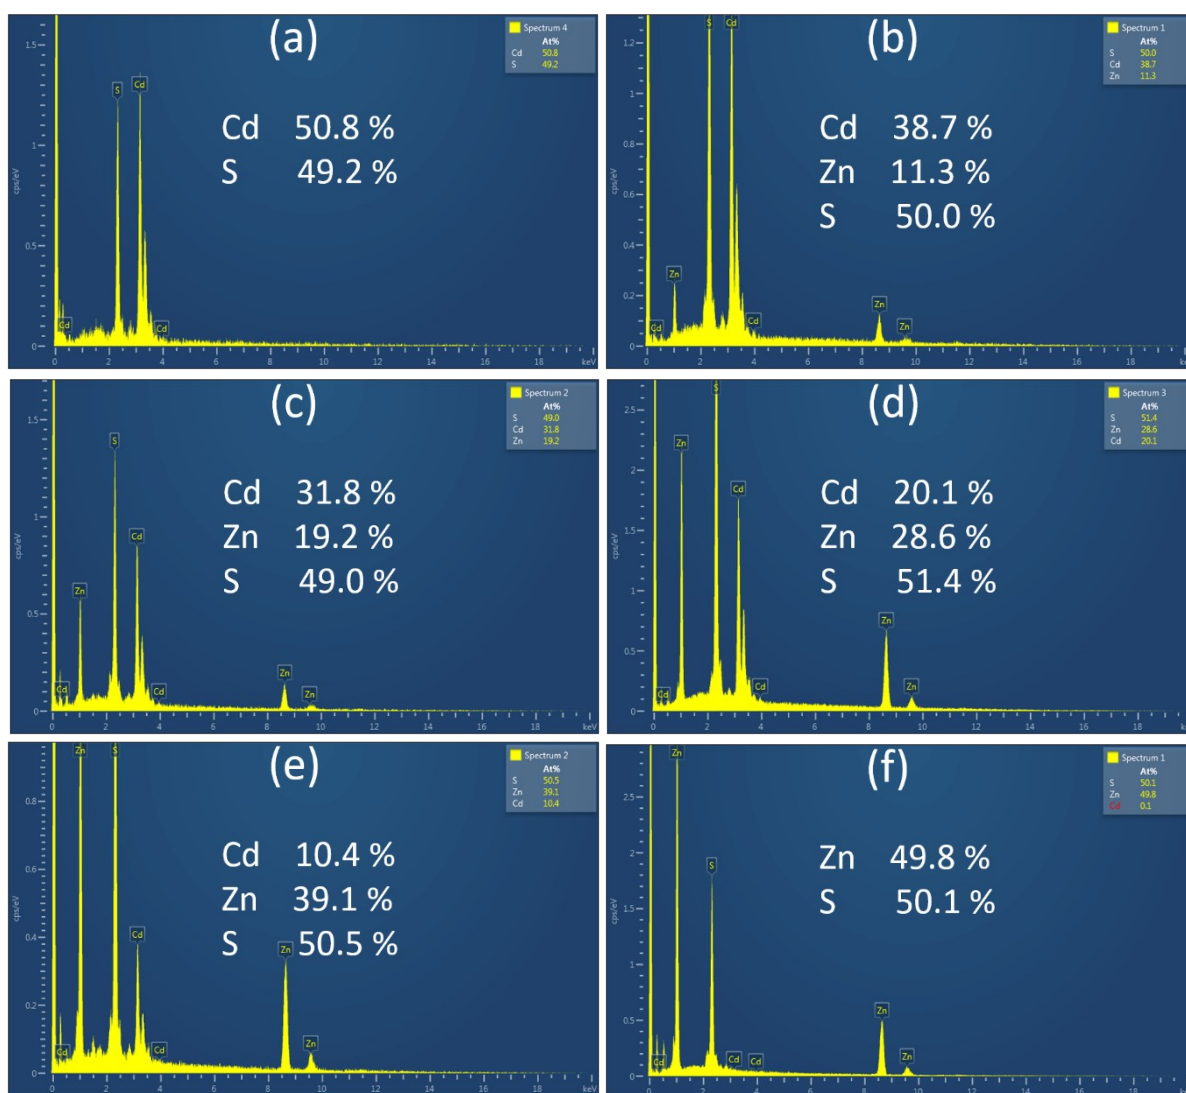

**Fig. S1** EDX spectra along with Cd, Zn and S at% of (a)  $\text{CdS}$  (b)  $\text{Cd}_{0.8}\text{Zn}_{0.2}\text{S}$  (c)  $\text{Cd}_{0.6}\text{Zn}_{0.4}\text{S}$  (d)  $\text{Cd}_{0.4}\text{Zn}_{0.6}\text{S}$  (e)  $\text{Cd}_{0.2}\text{Zn}_{0.8}\text{S}$  (f)  $\text{ZnS}$ . The X-axis and Y-axis title of the EDX spectra are energy (keV) and counts (cps), respectively.

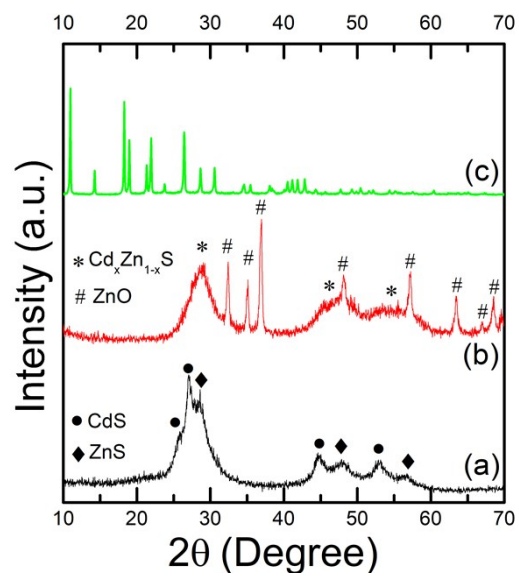

**Fig. S2** XRD patterns of sample prepared with (a) water (b) ethanol (c) ethylenediamine.

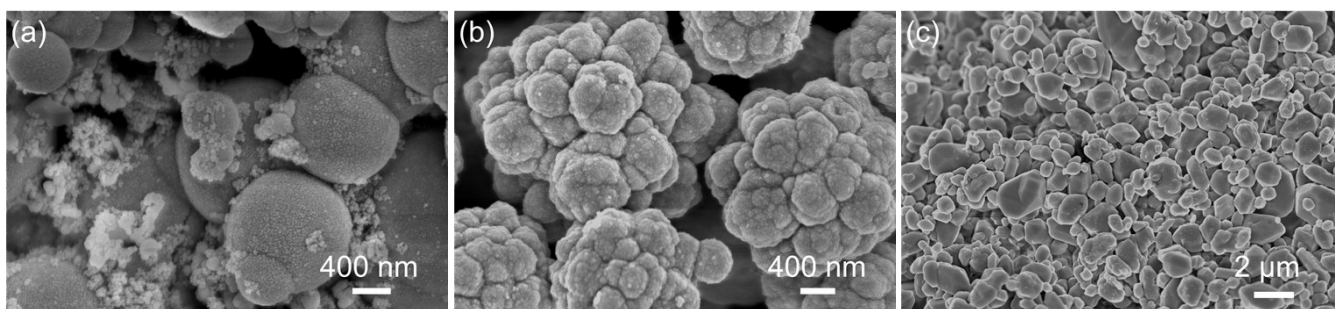

**Fig. S3** FESEM images of the sample prepared with (a) water, (b) ethanol, and (c) ethylenediamine.

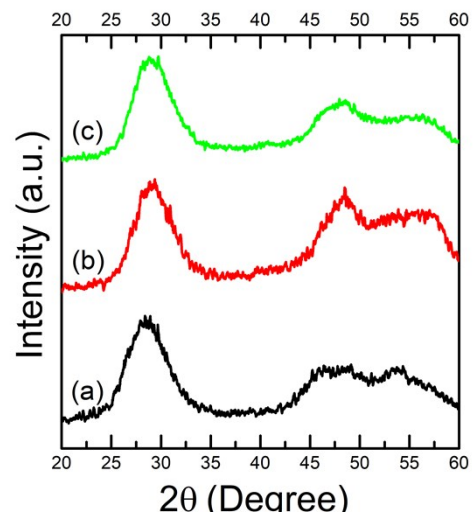

**Fig. S4** XRD patterns of Cd<sub>0.2</sub>Zn<sub>0.8</sub>S sample prepared with a reaction duration of (a) 2 h, (b) 4 h, and (c) 12 h.

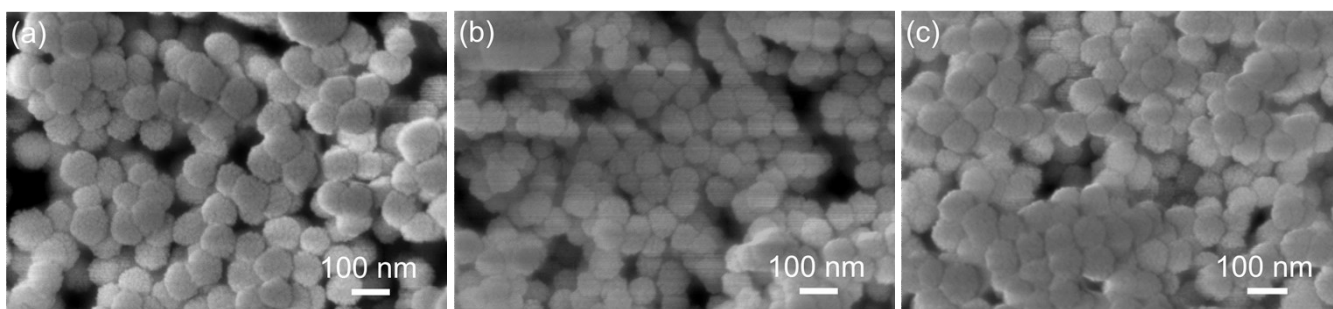

**Fig. S5** FESEM images of Cd<sub>0.2</sub>Zn<sub>0.8</sub>S samples prepared with a reaction duration of (a) 2 h, (b) 4 h, and (c) 12 h.

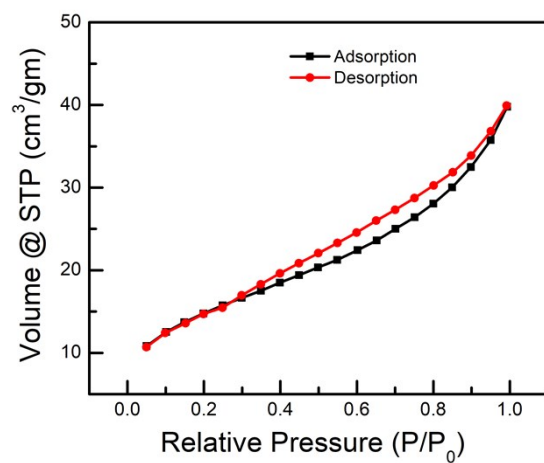

**Fig. S6** Nitrogen adsorption–desorption isotherm of  $\text{Cd}_{0.6}\text{Zn}_{0.4}\text{S}$ .

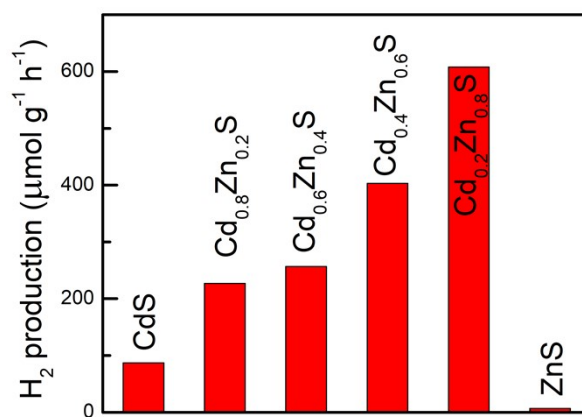

**Fig. S7** Photocatalytic  $\text{H}_2$  generation rate of synthesized samples.

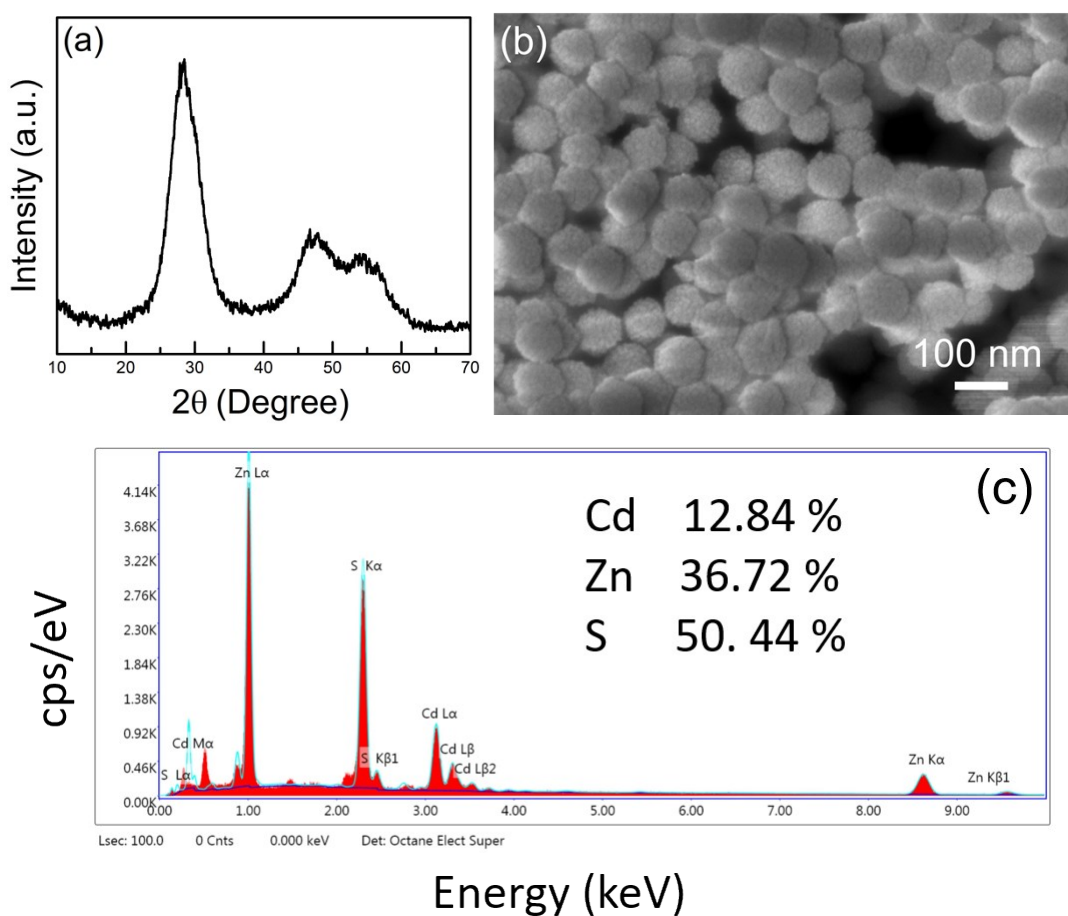

**Fig. S8** (a) XRD pattern, (b) FESEM image, and (c) EDX spectrum of  $\text{Cd}_{0.2}\text{Zn}_{0.8}\text{S}$  after 4<sup>th</sup> cycle of photocatalytic hydrogen generation.

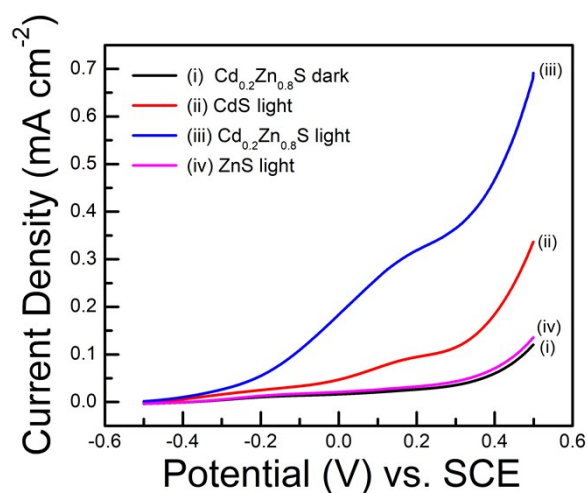

**Fig. S9** LSV plots of CdS, ZnS, and  $\text{Cd}_{0.2}\text{Zn}_{0.8}\text{S}$  under illumination and LSV plot of  $\text{Cd}_{0.2}\text{Zn}_{0.8}\text{S}$  under dark at a scan rate of  $10 \text{ mV s}^{-1}$ .

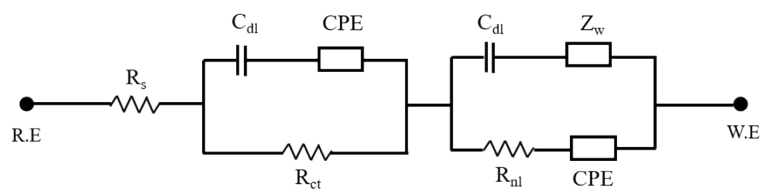

**Fig. S10** Equivalent circuit diagram of the Nyquist plot.
